# Supplementary material for: BcABF1 Plays a Role in the Feedback Regulation of Abscisic Acid Signaling via the Direct Activation of BcPYL4 Expression in Pakchoi
Source: MDPI journal article supplement (doi:10.3390/ijms25073877), 2024-03-30
Supplement: s1 [file s1]

## Supporting information:

**Figure S1: The phenotypic indicators of *BcABF1* transgenic plants.**

**Figure S2: Interaction analysis of *BcABF1* and *BcPYLs*.**

**Table S1: Primers used in this study.**

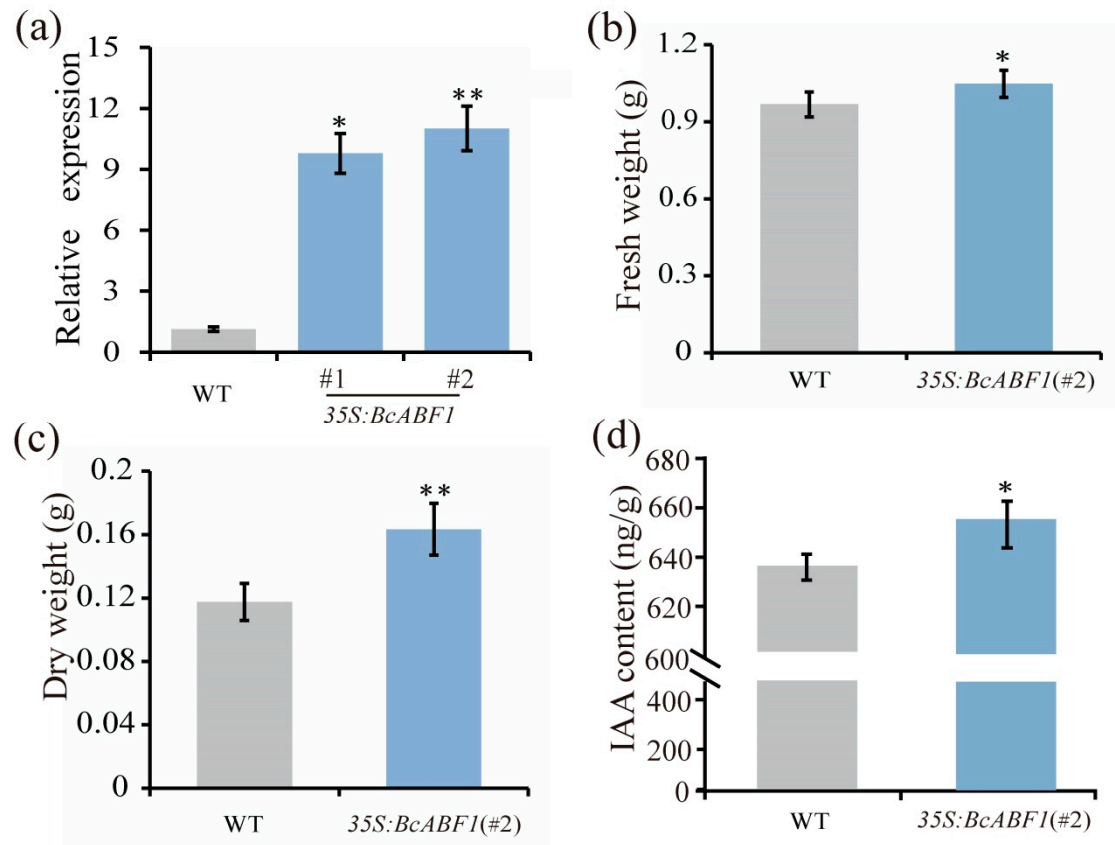

**Figure S1: The phenotypic indicators of *BcABF1* transgenic plants.**

(a) The mRNA abundance of *BcABF1* in 35S:*BcABF1*. (b) Fresh weight. 28-day 35S:*BcABF1* and WT were used to measure fresh weight (c) Dry weight. 28-day 35S:*BcABF1* and WT were used to measure dry weight. (d) IAA content in 35S:*BcABF1*. Data are three biological repeat averages (\*\* $p < 0.01$ , \* $p < 0.05$ , Student's *t*-test).

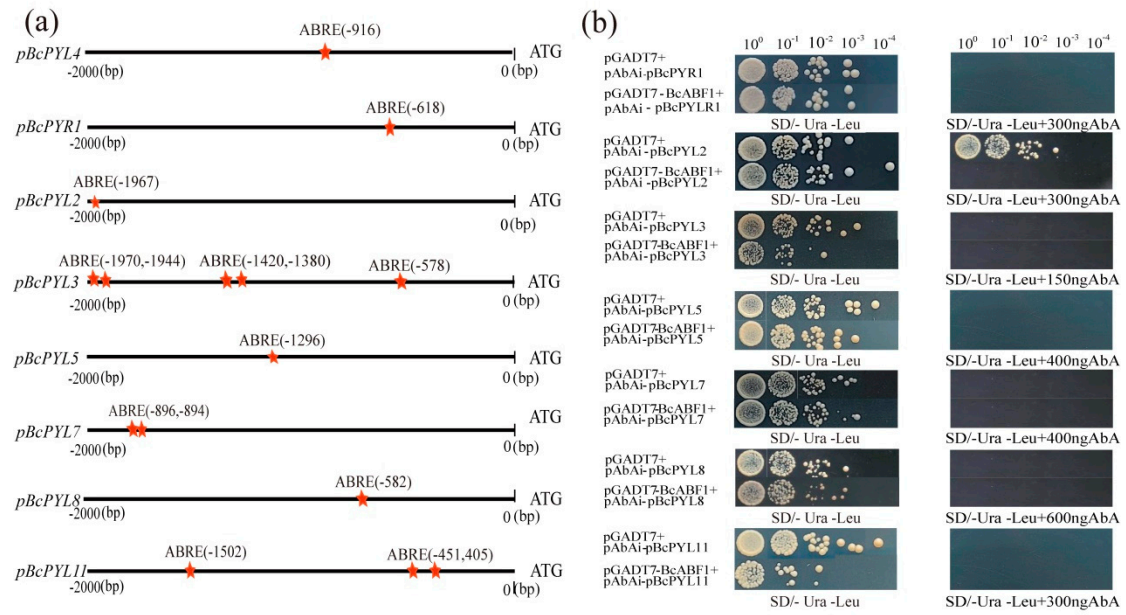

**Table S1: Primers used in this study**

| Primer Name      | Sequences (5'-3')                              | Function                            |
|------------------|------------------------------------------------|-------------------------------------|
| BcABF1-F         | ATGGGTACTCACATCAATTT                           | <b>Cloning</b>                      |
| BcABF1-R         | TTACCATGGACCGGTTAAGG                           |                                     |
| BcPYL4-F         | ATGCTCGCCGTACACCGCCCTTCCTCCG                   |                                     |
| BcPYL4-R         | CATGGACGTCTTCTTCTTCCCTTCCACC                   |                                     |
| pBcPYL4-F        | GTGGTTGAGAACCTGAATGGAT                         |                                     |
| pBcPYL4-R        | GTTCTTGTGTTTTATAGAA                            |                                     |
| pBcPYR1-F        | ATCAAGCAGGGAGAGCTATGGAAACG                     |                                     |
| pBcPYR1-R        | GAGATGTATTTATGTGGGACACAGGs                     |                                     |
| pBcPYL2-F        | CCAATGCCTTCTTCAATCA                            |                                     |
| pBcPYL2-R        | GATGATGAATAGATCACACGTG                         |                                     |
| pBcPYL3-F        | ATTTATAATTTTTTTTAAAGATATGAAAGTTA               |                                     |
| pBcPYL3-R        | CTCCATATGGTACGTGCTGGTG                         |                                     |
| pBcPYL5-F        | TGACGGCCGCGGCTGTGTTCTC                         |                                     |
| pBcPYL5-R        | TCTTGTCTTTATAGTTTTATTAATTGCGATTAT              |                                     |
| pBcPYL7-F        | AAAGTCAGACTACTCTTCTCC                          |                                     |
| pBcPYL7-R        | AAATTAGCTTTTATAATTTTTTCTTTTTAT                 |                                     |
| pBcPYL8-F        | CTTGCTCAATATAATGGTAAGTCT                       |                                     |
| pBcPYL8-R        | CTTAATTTTATTTTCTACCTTTTTTTTG                   |                                     |
| pBcPYL11-F       | TAAGAAAAATGAACTGATGATTTGTTGG                   |                                     |
| pBcPYL11-R       | TTGTTTGCTTTTTTACGCTTGTGCCC                     |                                     |
| pRI101-BcABF1-F  | TCTTCACTGTTGATACATATGATGGGTACTCACATCAATTTCAACA | <b>Dual-luciferasreporter assay</b> |
| pRI101-BcABF1-R  | GCTCACCATGGATCCGGTACCCCATGGACCGGTTAAG          |                                     |
| p0800-pBcPYL4-F  | CTTGATATCGAATTCCTGCGAGGTGGTTGAGAACCTGA         |                                     |
| p0800-pBcPYL4-R  | CGCTCTAGAACTAGTGGATCCGTTCTTGTGTTTTATA          |                                     |
| pAbAi-pBcPYL4-F  | CTTGAATTCGAGCTCGGTACCGTGGTTGAGAACCTGA          | <b>Yeast-one-hybrid assay</b>       |
| pAbAi-pBcPYL4-R  | ATACAGAGCACATGCCTCGAGGTTCTTGTGTTTTATA          |                                     |
| AD-BcABF1-F      | GCCATGGAGGCCAGTGAATTCATGGGTACTCACATC           |                                     |
| AD-BcABF1-R      | CAGCTCGAGCTCGATGGATCCCCATGGACCGGTTAA           |                                     |
| pAbAi-pBcPYR1-F  | CTTGAATTCGAGCTCGGTACCATCAAGCAGGGAGAGC          |                                     |
| pAbAi-pBcPYR1-R  | ATACAGAGCACATGCCTCGAGGAGATGTATTTATGTGGG        |                                     |
| pAbAi-pBcPYL2-F  | CTTGATATCGAATTCCTGCGAGCCAATGCCTTCTTCA          |                                     |
| pAbAi-pBcPYL2-R  | ATACAGAGCACATGCCTCGAGGATGATGAATAGATCA          |                                     |
| pAbAi-pBcPYL3-F  | CTTGATATCGAATTCCTGCGAGATTTATAATTTTTTTTAAAGAT   |                                     |
| pAbAi-pBcPYL3-R  | ATACAGAGCACATGCCTCGAGCTCCATATGGTACGT           |                                     |
| pAbAi-pBcPYL5-F  | CTTGATATCGAATTCCTGCGAGTGACGGCCGCGGCTG          |                                     |
| pAbAi-pBcPYL5-R  | ATACAGAGCACATGCCTCGAGTCTTGTCTTTATAGTTTTA       |                                     |
| pAbAi-pBcPYL7-F  | CTTGATATCGAATTCCTGCGAGAAAGTCAGACTACTCT         |                                     |
| pAbAi-pBcPYL7-R  | ATACAGAGCACATGCCTCGAGAAATTAGCTTTTATAATAT       |                                     |
| pAbAi-pBcPYL8-F  | CTTGATATCGAATTCCTGCGAGCTTGCTCAATATAATGG        |                                     |
| pAbAi-pBcPYL8-R  | ATACAGAGCACATGCCTCGAGCTTAATTTTATTTTCT          |                                     |
| pAbAi-pBcPYL11-F | CTTGATATCGAATTCCTGCGAGTAAGAAAAATGAACTGA        |                                     |
| pAbAi-pBcPYL11-R | ATACAGAGCACATGCCTCGAGTTGTTTGCTTTTTTACGC        |                                     |

|                  |                                                |                                                        |
|------------------|------------------------------------------------|--------------------------------------------------------|
| PBI121-pBcPYL4-F | ACCATGATTACGCCA <u>AAGCTT</u> GTGGTTGAGAACCTGA | <b>β-Glucuronidase<br/>staining and<br/>expression</b> |
| PBI121-pBcPYL4-R | GACTGACCACCCGGGATCCGTTCTTGTGTTTTATA            |                                                        |
| AtPYL4-Q-F       | ATATCCTCGACGACGAACGC                           | <b>qRT-PCR</b>                                         |
| AtPYL4-Q-R       | CACCACCAACAACGCTGAAG                           |                                                        |
| PP2A-Q-F         | AGGCTACACGTTCCGACAAG                           |                                                        |
| PP2A-Q-R         | TGGGGCACTAAACACAGTCA                           |                                                        |
| EIFA-Q-F         | TGACCACACAGTCTCTGCAA                           |                                                        |
| EIFA-Q-R         | ACCAGGGAGACTTGTTGGAC                           |                                                        |
| BcABF1-Q-F       | TCCGAGCTGGTGTGTGAAA                            |                                                        |
| BcABF1-Q-R       | GCATTGTTGCTGGTGCTTGA                           |                                                        |
| BcPYL4-Q-F       | AGTTTCAGCGTCGTTGGTGG                           |                                                        |
| BcPYL4-Q-R       | CAACAACCACGGTCCACAGA                           |                                                        |
| CYS5-Q-F         | GGTTGGAGTCCCATCAGCAA                           |                                                        |
| CYS5-Q-R         | CCGTCTCGAACTTGAGTCCC                           |                                                        |
| RD29A-Q-F        | TGCACCGGCTCATTCTGTAA                           |                                                        |
| RD29A-Q-R        | GCAGAGAGACCGGAGTGTTT                           |                                                        |
| RD29B-Q-F        | ACCATCCAGAAGAAGAAGAGCA                         |                                                        |
| RD29B-Q-R        | TCAACACTTTGGATGCTCCC                           |                                                        |
| RAB18-Q-F        | AGCTCGGAGGATGATGGACA                           |                                                        |
| RAB18-Q-R        | AGCCACCAGCATCATATCCG                           |                                                        |
| KIN2-Q-F         | GGAGCTTCCGCGCAACAG                             |                                                        |
| KIN2-Q-R         | GTTAACACCTCCCCTGCCC                            |                                                        |
| SOC1-Q-F         | GCTCAAGCAAAAGGAGAAAGC                          |                                                        |
| SOC1-Q-R         | TCGCTTTCATGAGATCCCCAC                          |                                                        |
| NYE1-Q-F         | TACCGGGATGAAGTTGTGGC                           |                                                        |
| NYE1-Q-R         | CCGTCTCGAACTTGAGTCCC                           |                                                        |
| NYC1-Q-F         | TCATTATCGAGCCGGTCCAC                           |                                                        |
| NYC1-Q-R         | TCCCCTAGTGCTTCCGGTTA                           |                                                        |

Note: The underline represents the enzyme cutting site.
